# Supplementary material for: Low cost microfluidic device based on cotton threads for electroanalytical application
Source: Royal Society of Chemistry journal article supplement (doi:10.1039/c5lc01348h), 2015-11-27
Supplement: c5lc01348h3.pdf [file c5lc01348h3.pdf]

Electronic Supplementary Information (ESI)

**Low cost microfluidic thread-based electroanalytical  
device**

*Deonir Agustini<sup>a</sup>, Márcio F. Bergamini<sup>a</sup>, Luiz Humberto Marcolino-Junior<sup>a\*</sup>*

<sup>a</sup>Laboratório de Sensores Eletroquímicos (LabSense), Departamento de Química,  
Universidade Federal do Paraná (UFPR), CEP 81.531-980, Curitiba-PR, Brazil.

\*email address: [luiz1berto@ufpr.br](mailto:luiz1berto@ufpr.br)

Telephone number: +55 41 3361-3177

Fax number: +55 41 3361-3186

**Table S1.** Materials cost estimation for a single  $\mu$ TED

| <b>Material</b>           | <b>Quantity used per device</b> | <b>Cost per device (\$)</b> |
|---------------------------|---------------------------------|-----------------------------|
| Glass plate               | 30 cm                           | 0.25                        |
| Double sided tape         | 5 cm                            | 0.07                        |
| Cylindrical graphite      | 3 piece (1.5 graphite)          | 0.06                        |
| Hydrophilic cotton gauze  | 1 piece (12 mm <sup>2</sup> )   | 0.0003                      |
| Hydrophilic cotton thread | 9 cm (27 mm <sup>2</sup> )      | 0.001                       |
| Polymeric reservoirs      | 2 units                         | 0.01                        |
| Total                     |                                 | 0.39                        |

**Table S2.** Analytical characteristics of the  $\mu$ TED – MPA method.

| <b>Characteristics</b>                              | <b>DCF</b> | <b>ACT</b> |
|-----------------------------------------------------|------------|------------|
| Linear range ( $\mu\text{mol L}^{-1}$ )             | 10 – 320   | 10 – 320   |
| Correlation coefficient                             | 0.9988     | 0.9936     |
| Slope ( $\text{nA } \mu\text{mol}^{-1} \text{ L}$ ) | 1.8227     | 0.8486     |
| Intercept (nA)                                      | -8.34      | 6.87       |
| LOD ( $\mu\text{mol L}^{-1}$ )                      | 1.43       | 2.49       |
| LOQ ( $\mu\text{mol L}^{-1}$ )                      | 4.77       | 8.30       |
| Analytical frequency (injections per hour)          | 45         | 45         |
| RSD                                                 | 2.95 %     | 2.81%      |

**Table S3** – Comparison of LOD and linear range for determination of ACT and DCF

| <b>Specie</b> | <b>LOD / <math>\mu\text{mol L}^{-1}</math></b> | <b>Linear range<br/><math>\mu\text{mol L}^{-1}</math></b> | <b>Device/Technique</b>                                  |
|---------------|------------------------------------------------|-----------------------------------------------------------|----------------------------------------------------------|
| ACT           | 0.3                                            | 0.35 – 100                                                | Microfluidic device/Amperometric detection <sup>39</sup> |
| ACT           | 25.0                                           | 50 – 2000                                                 | Microfluidic device/Amperometric detection <sup>40</sup> |
| ACT           | 1.94                                           | 331 - 1656                                                | Batch injection analysis/MPA <sup>41</sup>               |
| ACT           | 1.72                                           | -                                                         | Batch injection analysis/MPA <sup>42</sup>               |
| ACT           | 1.43                                           | 10 - 320                                                  | This work                                                |
| DCF           | 11.0                                           | 10 - 50                                                   | Batch injection analysis/MPA <sup>43</sup>               |
| DCF           | 0.14                                           | 5 - 50                                                    | Flow injection analysis /MPA <sup>44</sup>               |
| DCF           | 2.49                                           | 10 - 320                                                  | This work                                                |

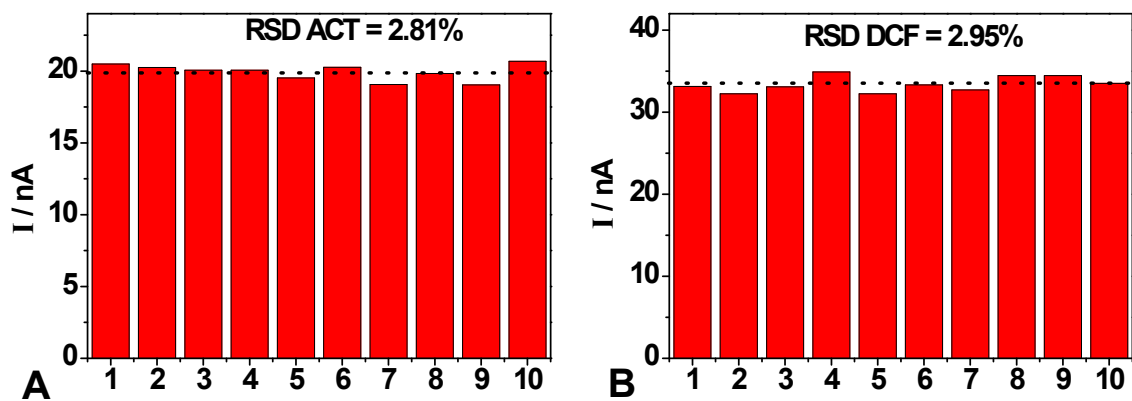

**Fig. S1** Current values for (A) ACT and (B) DCF, obtained in the  $\mu$ TED by MPA for injection ( $n = 10$ ) of PBS  $0.10 \text{ mol L}^{-1}$  pH 7.00 containing a mixture of  $20 \text{ }\mu\text{mol L}^{-1}$  DCF +  $20 \text{ }\mu\text{mol L}^{-1}$  ACT. The horizontal dashed line indicates the average value of currents obtained. Applied potential pulses:  $0.25 \text{ V} / 500 \text{ ms}$  and  $0.50 \text{ V} / 500 \text{ ms}$ ; Sample injection volume:  $2 \text{ }\mu\text{L}$ .
